# Supplementary material
Source: Springer Nature journal article supplement (https://www.springermedizin.de/resource/supplementary/12968_2012_2630_MOESM1_ESM.pdf/9582352)

T1W IR

A

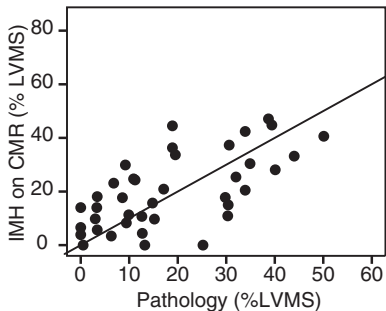

T2-STIR

B

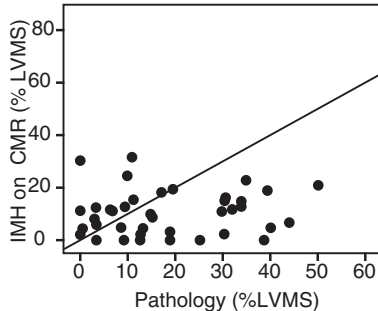

T2\*W

C

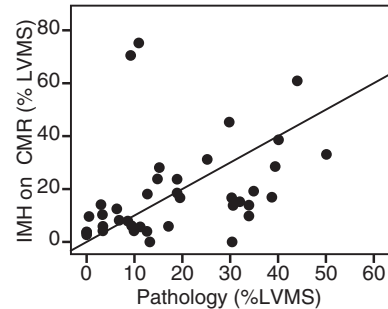

D

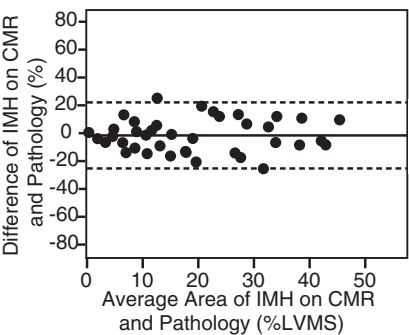

E

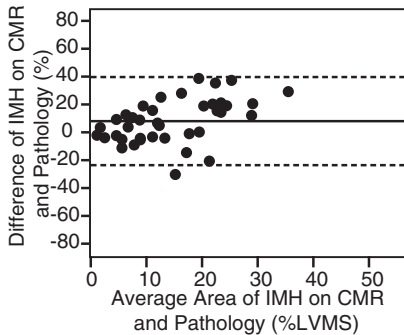

F

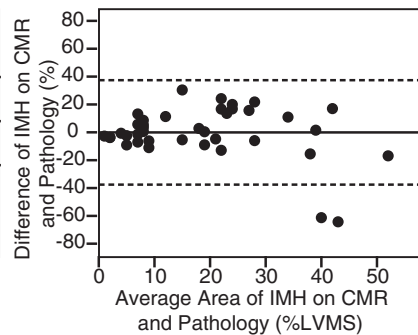

Supplement: MOESM1 [file 9582352]
